# Supplementary material for: Neighborhood Deprivation and Racial Disparities in Early Pregnancy Impaired Glucose Tolerance
Source: MDPI journal article supplement (doi:10.3390/ijerph20126175), 2023-06-19
Supplement: s1 [file s1]

**Table S1.** Characteristics of pregnant, non-diabetic patients residing in Philadelphia included in and excluded from the analytic cohort due to missing BMI (n= 1,824) or additionally missing hemoglobin A1c (n= 7,901) data.

|                                                            | All<br>(n=20,385) | Included in analysis<br>(n=10,642) | Excluded from analysis<br>(n=9,743) | P-value |
|------------------------------------------------------------|-------------------|------------------------------------|-------------------------------------|---------|
| <u>Characteristics</u>                                     |                   |                                    |                                     |         |
| Age (years), mean [SD]                                     | 30.0 [5.8]        | 30.2 [5.7]                         | 29.8 [5.9]                          | <0.001  |
| Obese ( $\geq 30$ kg/m <sup>2</sup> )                      | 5,322 (26.1)      | 3,384 (31.8)                       | 1,938 (24.5)                        | <0.001  |
| Race and ethnicity                                         |                   |                                    |                                     |         |
| Non-Hispanic Black                                         | 10,019 (49.1)     | 5,219 (49.0)                       | 4,800 (49.3)                        | 0.73    |
| Non-Hispanic White                                         | 6,222 (30.5)      | 3,237 (30.4)                       | 2,985 (30.6)                        |         |
| Another race or ethnicity                                  | 4,144 (20.3)      | 2,186 (20.5)                       | 1,958 (20.1)                        |         |
| Public Insurance                                           | 10,670 (52.3)     | 5,181 (48.7)                       | 5,489 (56.3)                        | <0.001  |
| Smoked during pregnancy                                    | 787 (4.2)         | 633 (6.0)*                         | 154 (1.9)^                          | <0.001  |
| Nulliparous                                                | 8,999 (44.1)      | 4,755 (44.7)                       | 4,244 (43.6)                        | 0.11    |
| Data presented as n (column %) unless otherwise specified. |                   |                                    |                                     |         |
| *missing n= 140                                            |                   |                                    |                                     |         |
| ^missing n= 1,557                                          |                   |                                    |                                     |         |

| <b>Table S2.</b> Results of sensitivity analysis including only individuals with pregnancy weight height measured (no imputation of BMI) (n=8,522) |                  |                        |
|----------------------------------------------------------------------------------------------------------------------------------------------------|------------------|------------------------|
| <b><u>Models of neighborhood deprivation with IGT</u></b>                                                                                          | <b><u>OR</u></b> | <b><u>(95% CI)</u></b> |
| M0 = Unadjusted                                                                                                                                    | 1.39             | (1.22, 1.59)           |
| M1 = M0 + age, insurance, parity                                                                                                                   | 1.43             | (1.31, 1.56)           |
| M2 = M1 + obesity                                                                                                                                  | 1.29             | (1.20, 1.40)           |
| M3 = M1 + race                                                                                                                                     | 1.14             | (1.05, 1.23)           |
| M4 = M1 + race + obesity                                                                                                                           | 1.07             | (0.99, 1.15)           |
| <b><u>Black patients</u></b>                                                                                                                       |                  |                        |
| M0 = Unadjusted                                                                                                                                    | 1.08             | (0.96, 1.21)           |
| M1 = M0 + age, insurance, parity                                                                                                                   | 1.19             | (1.06, 1.33)           |
| M2 = M1 + obesity                                                                                                                                  | 1.15             | (1.02, 1.29)           |
| <b><u>White patients</u></b>                                                                                                                       |                  |                        |
| M0 = Unadjusted                                                                                                                                    | 1.14             | (0.93, 1.40)           |
| M1 = M0 + age, insurance, parity                                                                                                                   | 1.07             | (0.86, 1.33)           |
| M2 = M1 + obesity                                                                                                                                  | 0.98             | (0.77, 1.23)           |
| <b><u>Models of neighborhood deprivation with obesity</u></b>                                                                                      |                  |                        |
| M0 = Unadjusted                                                                                                                                    | 1.76             | (1.46, 2.12)           |
| M1 = M0 + age, insurance, parity                                                                                                                   | 1.57             | (1.38, 1.79)           |
| M2 = M1 + race                                                                                                                                     | 1.39             | (1.27, 1.53)           |
| <b><u>Black patients</u></b>                                                                                                                       |                  |                        |
| M0 = Unadjusted                                                                                                                                    | 1.08             | (0.99, 1.18)           |
| M1 = M0 + age, insurance, parity                                                                                                                   | 1.13             | (1.03, 1.23)           |
| <b><u>White patients</u></b>                                                                                                                       |                  |                        |
| M0 = Unadjusted                                                                                                                                    | 1.76             | (1.44, 2.15)           |
| M1 = M0 + age, insurance, parity                                                                                                                   | 1.53             | (1.26, 1.85)           |
